# Supplementary material
Source: Springer Nature journal article supplement (https://www.springermedizin.de/resource/supplementary/12955_2005_197_MOESM8_ESM.pdf/9559878)

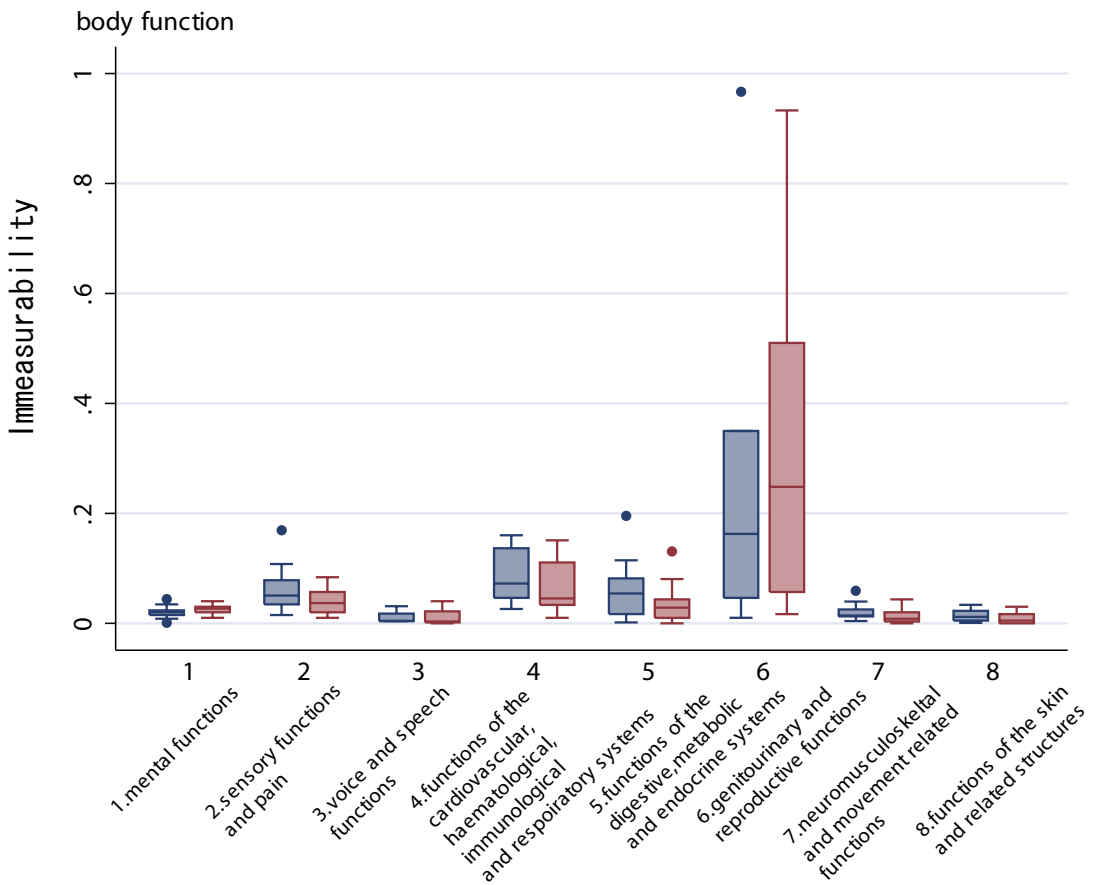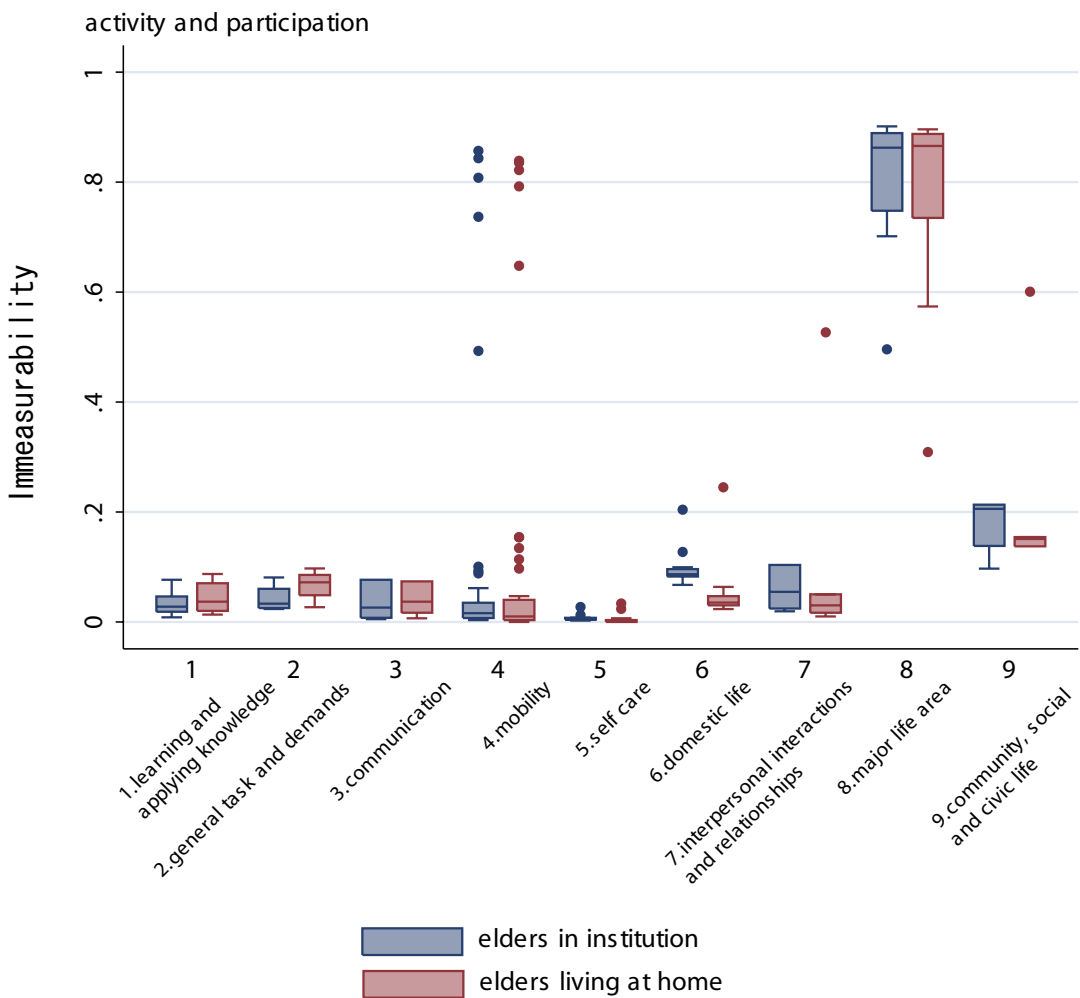

Supplement: MOESM8 [file 9559878]
